# Supplementary material for: Author Correction: BIM and mTOR expression levels predict outcome to erlotinib in EGFR-mutant non-small-cell lung cancer
Source: PubMed Central journal article supplement (PMC9984426; doi:10.1038/s41598-023-30374-9), 2023-03-03
Supplement: 41598_2023_30374_MOESM1_ESM.pdf [file 41598_2023_30374_MOESM1_ESM.pdf]

**BIM and mTOR expression levels predict outcome to erlotinib in EGFR-mutant non-small-cell lung cancer**

**Supplementary Material**

**Supplementary Table 1.** Patient characteristics of the 19 patients included in the validation cohort

| <b>Clinical parameter</b>   | <b>N(%)</b> |
|-----------------------------|-------------|
| <b>Sex</b>                  |             |
| Female                      | 14 (73.7)   |
| Male                        | 5 (26.3)    |
| <b>Age group</b>            |             |
| <65 years                   | 11 (77.9)   |
| >= 65 years                 | 8 (42.1)    |
| <b>Smoking status</b>       |             |
| Never smoker                | 15 (78.9)   |
| Former smoker               | 3 (15.8)    |
| Current Smoker              | 1 (5.3)     |
| <b>ECOG PS</b>              |             |
| 0-1                         | 12 (63.2)   |
| 2                           | 7 (36.8)    |
| <b>Histologic Diagnosis</b> |             |
| Adenocarcinoma              | 19 (100.0)  |
| <b>Clinical Stage</b>       |             |
| IIIA                        | 1 (5.3)     |
| IIIB                        | 2 (10.5)    |
| IV                          | 16 (84.2)   |
| <b>Bone metastasis</b>      |             |
| Yes                         | 9 (47.4)    |
| No                          | 10 (52.6)   |
| <b>Brain metastasis</b>     |             |
| Yes                         | 7 (36.8)    |
| No                          | 12 (63.2)   |
| <b>Other metastasis</b>     |             |
| Yes                         | 12 (63.2)   |
| No                          | 7 (36.8)    |

|                              |           |
|------------------------------|-----------|
| <b>Type of EGFR mutation</b> |           |
| del19                        | 12 (63.2) |
| L858R                        | 7 (36.8)  |
| <b>Type of EGFR TKI</b>      |           |
| Erlotinib                    | 13 (68.4) |
| Gefitinib                    | 5 (26.3)  |
| Afatinib                     | 1 (5.3)   |
| <b>Response</b>              |           |
| Complete response            | 2 (10.5)  |
| Partial response             | 10 (52.6) |
| Stable disease               | 7 (36.8)  |

**Supplementary Table 2:** Univariate analyses of progression-free and overall survival in 57 patients from the EURTAC trial included in the present study.

| Variable                       | PFS               |       | OS                |       |
|--------------------------------|-------------------|-------|-------------------|-------|
|                                | HR (95%CI)        | P     | HR (95%CI)        | P     |
| <b>Gender</b>                  |                   |       |                   |       |
| Female                         | 1.00              | -     | 1.00              |       |
| Male                           | 1.14 (0.60, 2.18) | .6859 | 1.20 (0.63, 2.28) | .5773 |
| <b>Smoking history</b>         |                   |       |                   |       |
| Current smoker                 | 1.00              |       | 1.00              |       |
| Never smoked                   | 1.10 (0.33, 3.68) | .8737 | 0.39 (0.15, 1.05) | .1791 |
| Former smoker                  | 1.05 (0.30, 3.68) | .9391 | 0.46 (0.17, 1.31) | .1472 |
| <b>ECOG performance status</b> |                   |       |                   |       |
| 1,2                            | 1.00              |       | 1.00              |       |
| 0                              | 0.67 (0.35, 1.27) | .2156 | 0.78 (0.41, 1.49) | .4554 |
| <b>Treatment</b>               |                   |       |                   |       |
| Chemotherapy                   | 1.00              |       | 1.00              |       |
| Erlotinib                      | 0.48 (0.25, 0.93) | .0265 | 1.28 (0.69, 2.35) | .4321 |
| <b>Bone metastasis</b>         |                   |       |                   |       |
| No                             | 1.00              |       | 1.00              |       |
| Yes                            | 1.50 (0.77, 2.92) | .2298 | 1.19 (0.60, 2.38) | .6178 |
| <b>Brain metastasis</b>        |                   |       |                   |       |
| No                             | 1.00              |       | 1.00              |       |
| Yes                            | 2.31 (0.89, 5.97) | .0749 | 2.66 (1.10, 6.43) | .0293 |
| <b>Type of EGFR mutation</b>   |                   |       |                   |       |
| del19                          | 1.00              |       | 1.00              |       |
| L858R                          | 0.69(0.36, 1.30)  | .2467 | 0.87(0.46, 1.64)  | .6659 |
| <b>BIM expression</b>          |                   |       |                   |       |
| Low/intermediate               | 1.00              |       | 1.00              |       |
| High                           | 0.40 (0.20, 0.80) | .0095 | 0.39 (0.19, 0.82) | .0124 |

**Supplementary Table 3.** Primers and probes used for gene expression analyses

| GENES          | REFSEQ       |   | PRIMERS                        | PROBES                              |
|----------------|--------------|---|--------------------------------|-------------------------------------|
| <i>β-actin</i> | NM_001101.3  | F | 5' TGAGCGCGGCTACAGCTT 3'       | 6FAM 5' ACCACCACGGCCGAGCGG 3' TAMRA |
|                |              | R | 5' TCCTTAATGTCACGCACGATTT 3'   |                                     |
| <i>MTOR</i>    | NM_004958    | F | 5' AGGCCGCATTGTCTCTATCAA 3'    | 6FAM 5' TGCAATCCAGCTGTTTG 3' MGB    |
|                |              | R | 5' GCAGTAAATGCAGGTAGTCATCCA 3' |                                     |
| <i>DGKA</i>    | NM_001345    | F | 5' CCCAGTGATTTTGCCAGC 3'       | 6FAM 5' AATACTCCACCAAAAAG 3' MGB    |
|                |              | R | 5' CCATCCTCGAAGAGCTTTAGGA3'    |                                     |
| <i>PDE4A</i>   | NM_001111307 | F | 5' GGAGACCATGCAGACCTATCG 3'    | 6FAM 5' TGGCCTCGCACAAGT 3' MGB      |
|                |              | R | 5' GTCACGGTTCAACATCCTTTT3'     |                                     |
| <i>PDE4D</i>   | NM_001104631 | F | 5' ATCATCCTGGTGTGTCCAATCA 3'   | 6FAM 5' TCTGATCAATACAACTCT 3' MGB   |
|                |              | R | 5' GGAATCATTGTACATCAAGGCAAGT3' |                                     |

Supplementary Figures:

Supplementary Figure 1:

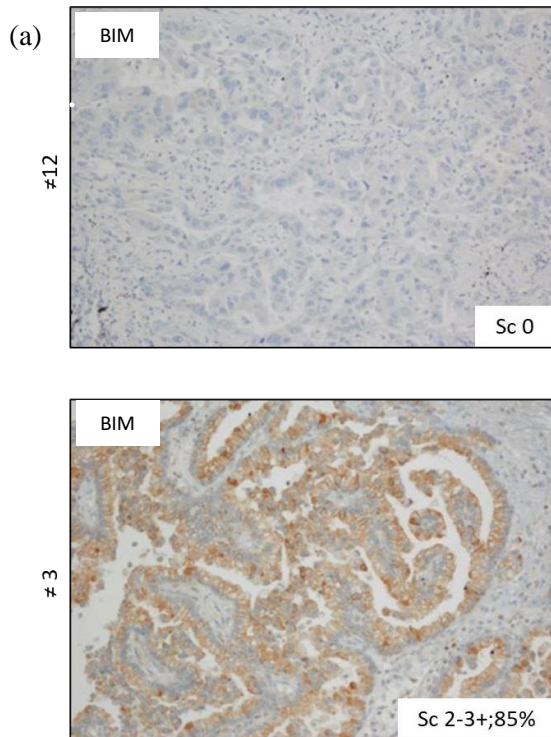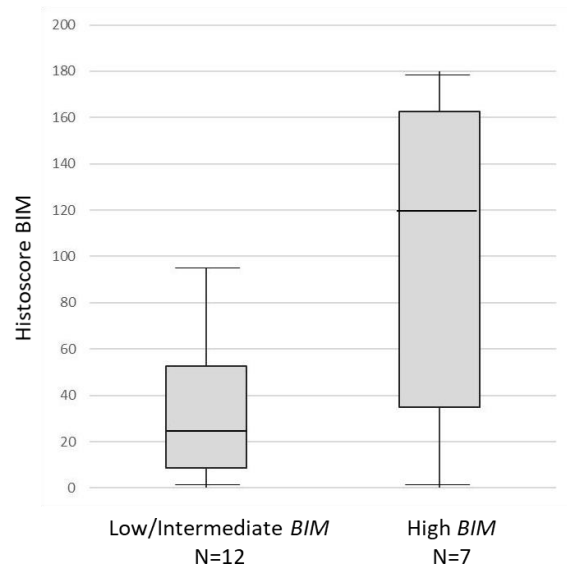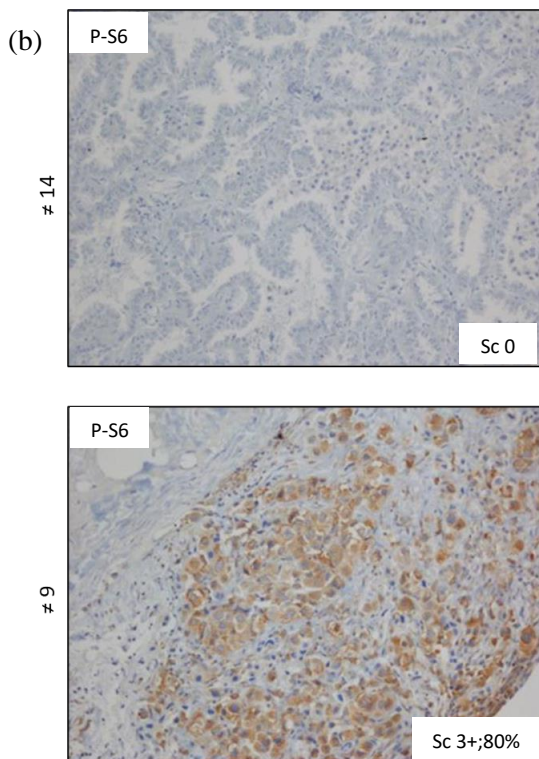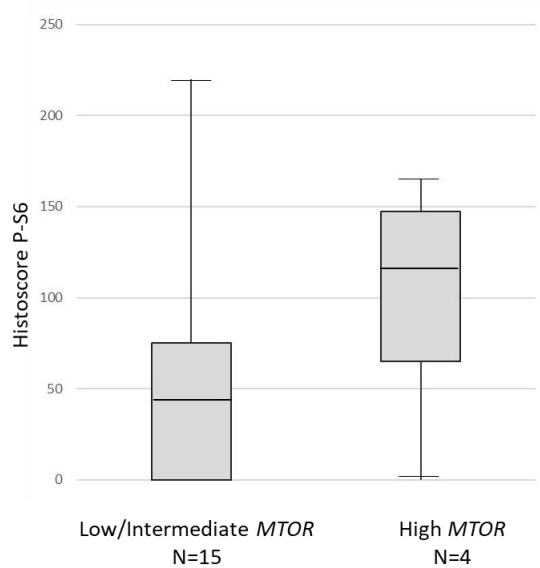

## **Examples of immunohistochemical analysis and correlation between mRNA and**

**protein expression. (a).** Left: Representative cases of BIM protein expression. BIM staining was considered positive when either strong (3+) or moderate (+2) cytoplasmic staining was observed (scale bar 100 $\mu$ m).

Representative IHC staining images for a negative case (score 0; Sc 0) and a positive case (score 2-3+ in 85% of the cells; Sc 2-3+). Right: The correlation between BIM protein and mRNA expression is presented by box- and -whisker plots. Medians, interquartile, maximum and minimum are shown. Though not statistically significant a trend for a positive correlation was found between *BIM* mRNA and protein expression (Wilcoxon test two-side *P* value = .1161). **(b).** Representative cases of P-S6 protein expression with anti-p-S6 (Ser240/244). P-S6 staining was considered positive when only strong (3+) cytoplasmic staining was observed (scale bar 100 $\mu$ m). Representative IHC staining images for a negative case (score 0; Sc 0) and a positive case (score 3+ in 80% of the cells; Sc 3+). Right: The correlation between P-S6 protein and *MTOR* mRNA expression is presented by box- and -whisker plots. Medians, interquartile, maximum and minimum are shown. Though not statistically significant a trend for a positive correlation was found between *MTOR* mRNA and P-S6 protein expression (Wilcoxon test two-side *P* value = .4048).

Supplementary Figure 2:

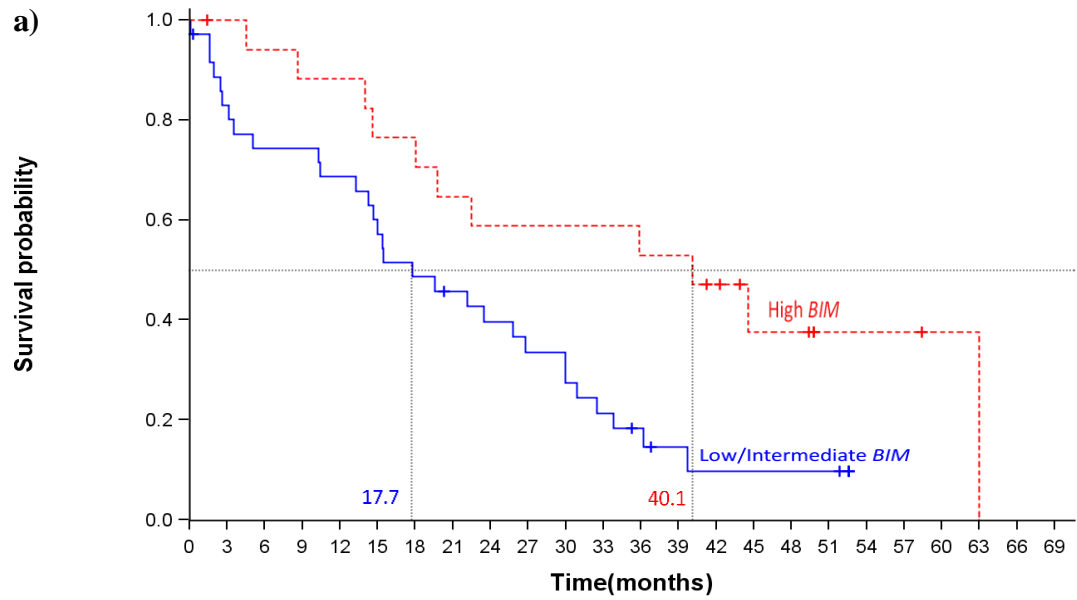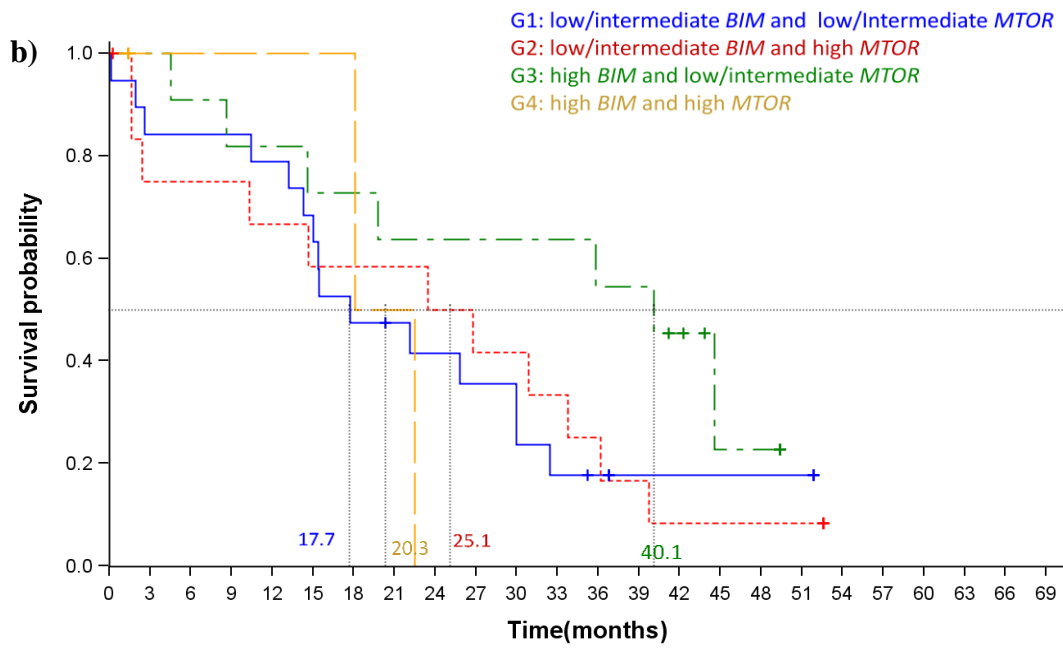

**Overall survival, according to *BIM* and *MTOR* mRNA expression levels for the training cohort of patients from the EURTAC study. (a).** Overall survival

according to *BIM* mRNA levels for all the 57 *EGFR*-mutant NSCLC patients included in the present analysis. OS was 40.1 months (95%CI 14.6-63.0) for the 36 patients with high *BIM* (red line) and 17.7 months (95%CI 13.2-26.8) for the 18 patients with low/intermediate *BIM* mRNA expression (blue line);  $P=.010$ .

**(b).** Overall survival by *BIM* and *MTOR* mRNA levels for the 46 *EGFR*-mutant NSCLC patients of the training cohort in whom both *BIM* and *MTOR* mRNA evaluation was possible. Median OS was 17.7 (95%CI 13.3-30), for 19 patients (G1) with low/intermediate both *BIM* and *MTOR* and 25.1 months (95%CI 1.6-36.2) for the 13 patients (G2) with low/intermediate *BIM* and high *MTOR*. Median OS was 40.1 months (95%CI 8.6-NR) for 11 patients (G3) with high *BIM* and low/intermediate *MTOR* and 20.3 months (95%CI 18.1-22.5) for three patients (G4) with high both *BIM* and *MTOR*;  $P=.2497$ .

Note Supplementary Figure 2: *BIM* expression levels were divided into high ( $>2.96$ ) and low ( $<1.83$ ) or intermediate (1.83-2.96). *MTOR* expression levels were divided into high ( $>1.97$ ) and low ( $<0.91$ ) or intermediate (0.91-1.97).

### Supplementary Figure 3:

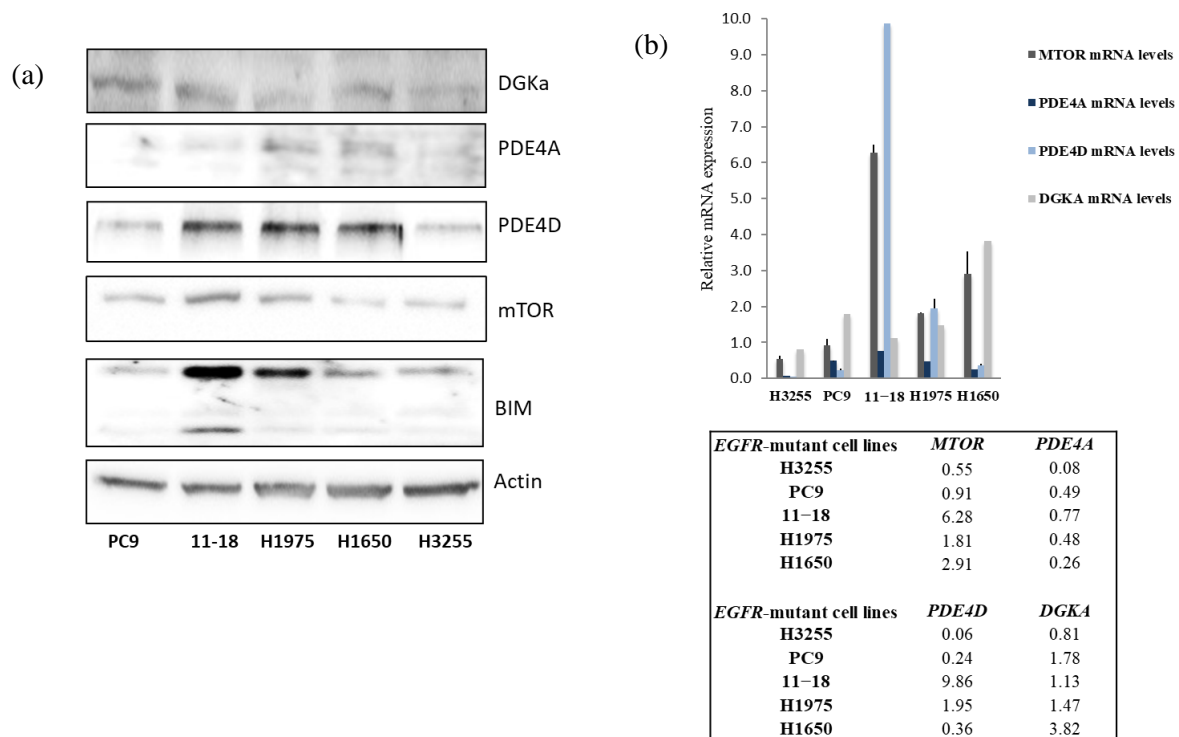

#### Correlation of *MTOR* expression with the expression of *DGKA* and *PDE4*. (a).

*mTOR* and *DGKa*, *PDE4A* and *PDE4D* expression in *EGFR*-mutant lung adenocarcinoma cell lines. Cell lysates were collected and probed with anti-*mTOR* and anti-*DGKa*, anti-*PDE4A* anti-*PDE4D* antibodies. Actin was used as the loading control. The protein levels of *PDE4D* and *mTOR* are similarly increased in 11-18, H1975 and H1650 cells. (b). *MTOR*, *DGKA*, *PDE4A* and *PDE4D* mRNA expression in *EGFR*-mutant lung adenocarcinoma cell lines by qRT-PCR normalized to  $\beta$ -actin. Correlation between the four biomarkers was assessed using Pearson's correlation analysis. There was a significant positive correlation between *MTOR* and *PDE4D* mRNA expression ( $r=0.92$ ,  $P=.0244$ ). Pearson correlation coefficients ( $r$ ) of 0.75 ( $P=.1418$ ) and 0.05 ( $P=.09413$ ) were found between *MTOR* and *PDE4A* and *MTOR* and *DGKA*, respectively. Values are the mean  $\pm$  standard deviation of triplicate experiments. Error bars indicate the standard deviation.
